# Supplementary material
Source: MDPI journal article supplement (https://www.mdpi.com/2071-1050/12/22/9647)
Supplement: s1 [file s1]

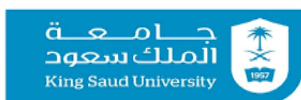

**King Saud University**

**College of Food and Agriculture Sciences**

**Department of Agricultural Extension and Rural Society**

**Assessing farmers' knowledge of Red Palm Weevil symptoms and their adoption of integrated pest management**

**October 2019**

**-Questionnaire-**

**First: Personal information**

1- Age (            years).

2- Education (            years).

3- Main occupation:

Farming (            ) Trader (            ) Employee (            ) Craftsman (            )

4- Farming experience (            years).

5- Farm size (            hectares).

6- The number of palm trees in your farm (            ).

7- Intercropping    Yes (    )    No (    )

8- Regular contact with extension workers: Yes (    )    No (    )

9- Membership in agricultural associations: Yes (    )    No (    )

**Second: Knowledge of Red Palm Weevil symptoms**

Could you please describe the visual symptoms of RPW or the type of damage it causes on palm trees?

.....

.....

.....

.....

.....

.....

.....

.....

### Third: Adoption of integrated pest management for RPW control

Please indicate your level of adoption regarding the following practices:

| Practice                                                                                         | Adoption level |            |           |        |       |
|--------------------------------------------------------------------------------------------------|----------------|------------|-----------|--------|-------|
|                                                                                                  | Always         | Frequently | Sometimes | Seldom | Never |
| <b>Prevention</b>                                                                                |                |            |           |        |       |
| P1- Checking trees at regular intervals to detect early infestation                              |                |            |           |        |       |
| P2- Removing offshoots as a protective measure                                                   |                |            |           |        |       |
| P3- Removing fronds by applying pruning in the winter                                            |                |            |           |        |       |
| P4- Using pheromone traps to detect early infestation                                            |                |            |           |        |       |
| P5- Treating wounds resulted from removing frond bases and offshoots by using contact pesticides |                |            |           |        |       |
| <b>Legislative control</b>                                                                       |                |            |           |        |       |
| L1- Adhering to not transferring infested trees or offshoots to non-infested areas               |                |            |           |        |       |
| L2- Burning and burying the infested palm far away after cutting it into small portions          |                |            |           |        |       |
| L3- Adhering to not transferring infested palm waste to other areas                              |                |            |           |        |       |
| L4- Surveying RPW-infested palms and informing authorities when necessary                        |                |            |           |        |       |
| L5- Not allowing anyone to transfer infested offshoots from an infested farm                     |                |            |           |        |       |
| <b>Cultural practices</b>                                                                        |                |            |           |        |       |
| C1- Adhering to the time and depth specified for planting offshoots                              |                |            |           |        |       |
| C2- Applying moderate irrigation to reduce humidity on farms                                     |                |            |           |        |       |
| C3- Adhering to good plowing before planting                                                     |                |            |           |        |       |
| C4- Maintaining the recommended distance between trees                                           |                |            |           |        |       |

| Practice                                                                                      | Adoption level |            |           |        |       |
|-----------------------------------------------------------------------------------------------|----------------|------------|-----------|--------|-------|
|                                                                                               | Always         | Frequently | Sometimes | Seldom | Never |
| <b>Mechanical control</b>                                                                     |                |            |           |        |       |
| M1- Covering roots of small trees with soil to a height of 20 cm to prevent insect attacks    |                |            |           |        |       |
| M2- Removing weeds and dry trunks and disposing of them in the recommended way                |                |            |           |        |       |
| M3- Eradicating infested palms                                                                |                |            |           |        |       |
| M4- Removing infested or dead trees and the pruning products on neglected farms               |                |            |           |        |       |
| M5- Closing all openings on the trunks of palms                                               |                |            |           |        |       |
| M6- Scraping infested areas until healthy tissue is exposed                                   |                |            |           |        |       |
| <b>Chemical control</b>                                                                       |                |            |           |        |       |
| CH1- Spraying according to extension recommendations                                          |                |            |           |        |       |
| CH2- Spraying pesticides of a proper quantity and quality and within the specified time frame |                |            |           |        |       |
| CH3- Dusting farms                                                                            |                |            |           |        |       |

Thank you very much for taking the time to complete our survey. Your participation will help us to understand the adoption of integrated pest management for RPW control.
